# Supplementary material
Source: PubMed Central journal article supplement (PMC4558693)
Supplement: supp_tpc.114.135731_tpc135731_Supplemental.pdf [file supp_tpc.114.135731_tpc135731_Supplemental.pdf]

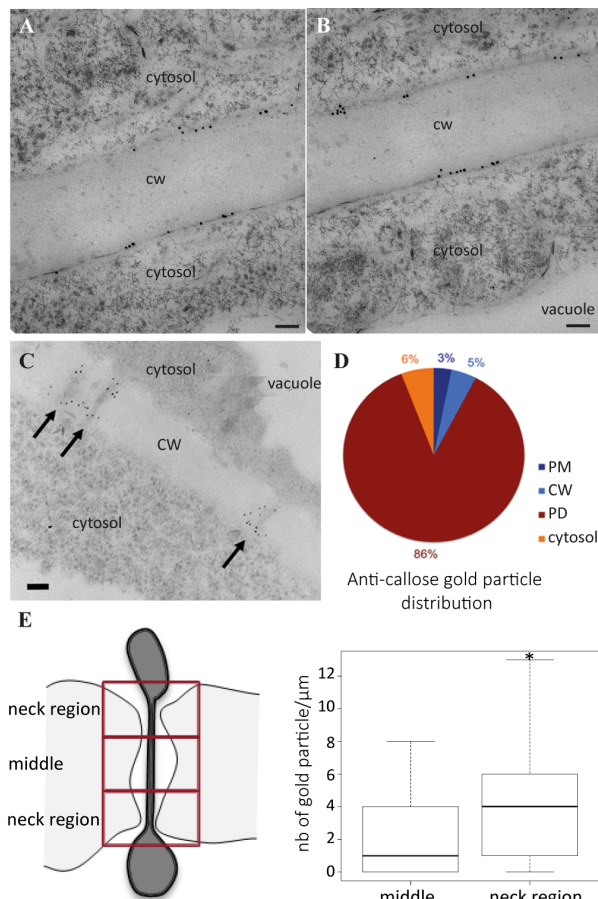

**Supplemental Figure 1.**

**Immunogold labelling of PMA2 and callose in cryo-substituted Arabidopsis suspension cells.**

**(A, B)** PMA2 immunogold labelling (10 nm gold particles) showing that the proton pump ATPase is tightly associated with the PM. Scale Bars= 100 nm

**(C)** Callose immunogold labelling (5 nm gold particles) showing that callose is mainly associated with PD (arrows). Scale Bar= 100 nm

**(D)** Quantification of callose gold particle distribution at the PM, cell wall (CW), PD and cytosol (n=222 gold particles from 32 micrographs).

**(E)** Quantification of callose gold particle distribution along the PD channels. Micrographs with PD channels visible from neck to neck were selected and gold particle association with either the PD orifice or PD central region estimated (channels were divided into three identical regions of interest). The number of gold particles associated with the neck region was slightly higher than for the central region (n= 210 and 71 gold particles for neck and central region respectively; from 31 micrographs). Asterisks indicate a significant difference ( $p < 0.05$  for one asterisk) by Wilcoxon test.

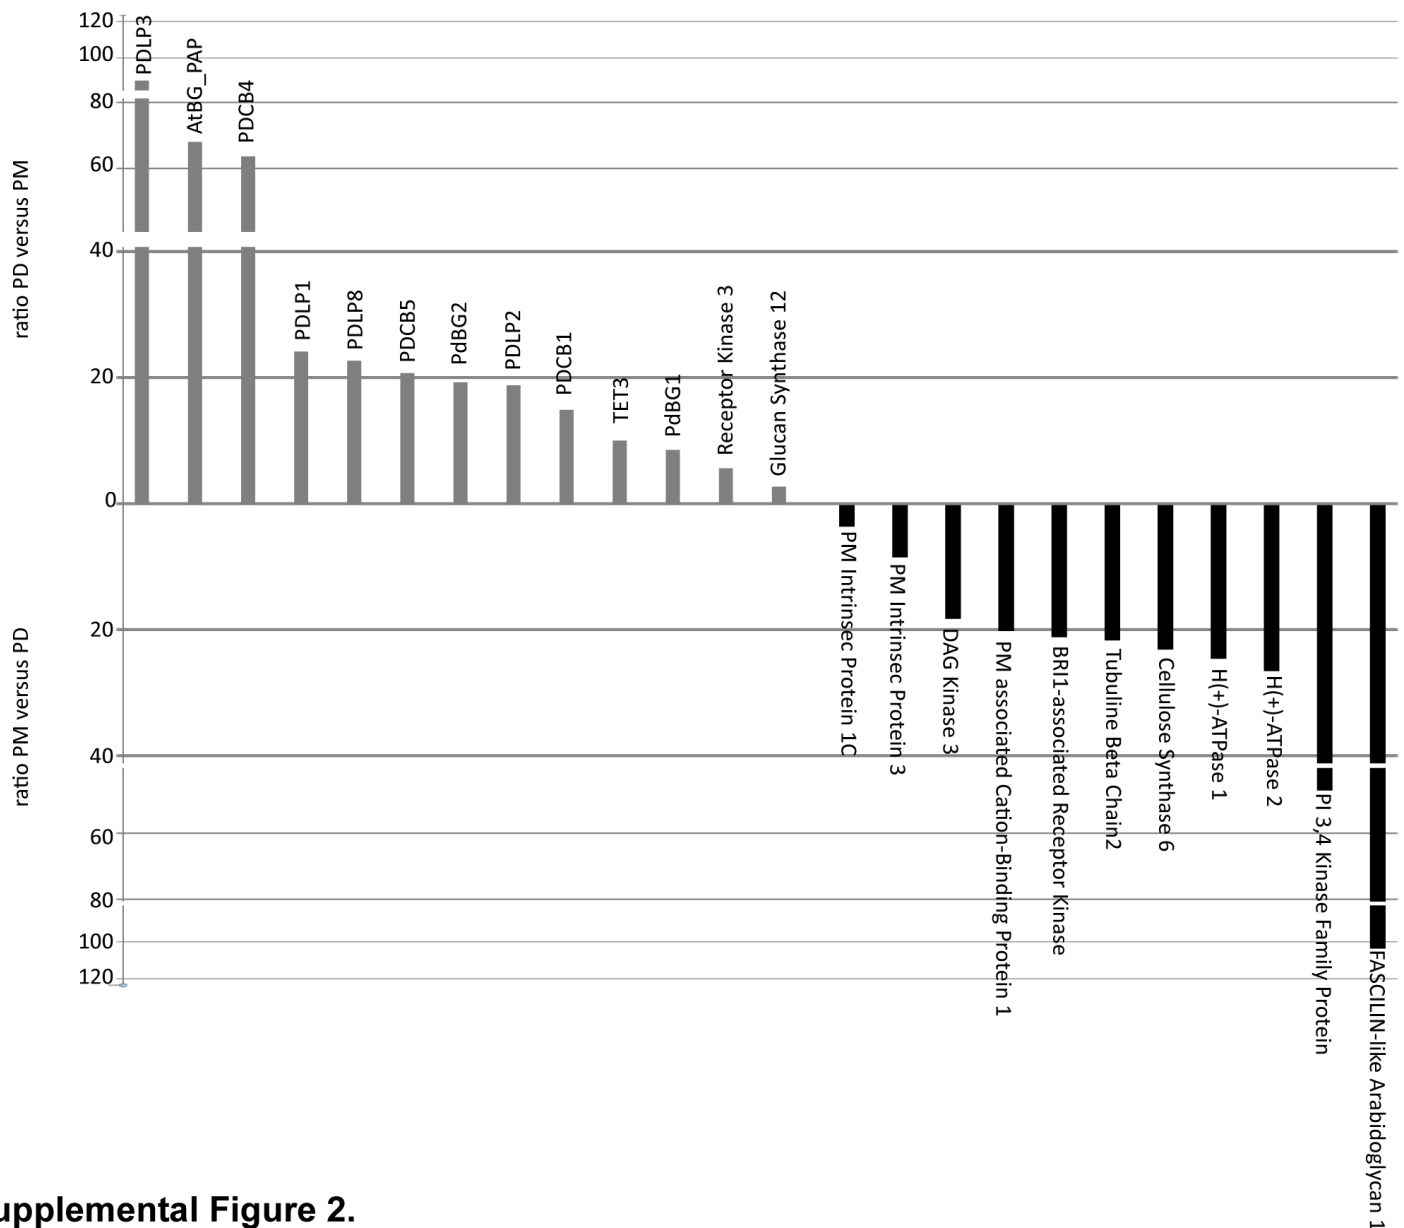

## Supplemental Figure 2.

**Quantitative proteomic analysis reveals that PD-associated proteins are highly enriched in the PD fraction compared to the bulk PM.**

Ten micrograms of PD and PM fractions were subjected to proteomic analysis after trypsin digestion by LC/MS/MS (n=3). The relative abundance of specific proteins was compared between the two samples after summing the signal intensity of their individual peptides. Known PD-associated proteins are greatly enriched in the PD fraction when compared to the PM (gray). By contrast classical PM proteins show consequential depletion (black).

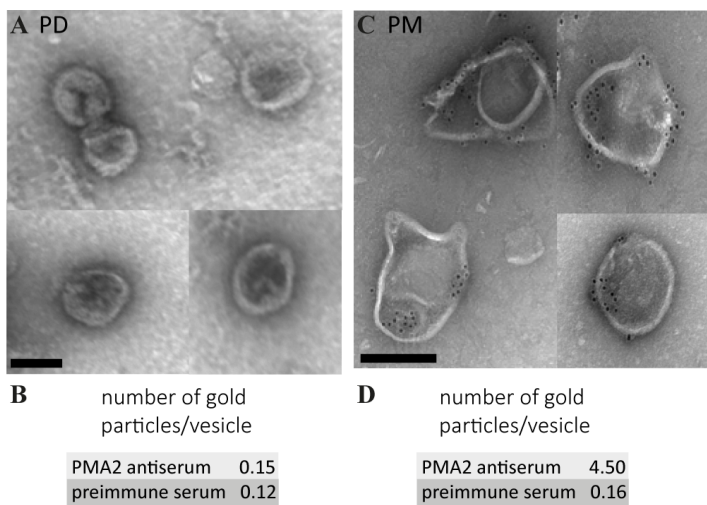

### Supplemental Figure 3.

#### Immunogold labelling of PMA2 on purified PD and PM fractions.

Electron micrograph of PMA2 immunogold labelling of the PD (**A**) and PM (**C**) fractions showing that PMA2 heavily labels PM but not PD-enriched membrane vesicles. The density of gold particles per vesicle (**B** and **D**) was calculated for both negative control (n=82 vesicles for PD and n=93 for PM) and specific anti-serum (n=61 vesicles for PD and n=114 for PM). Scale Bar= 50 nm for A and 200 nm for B.

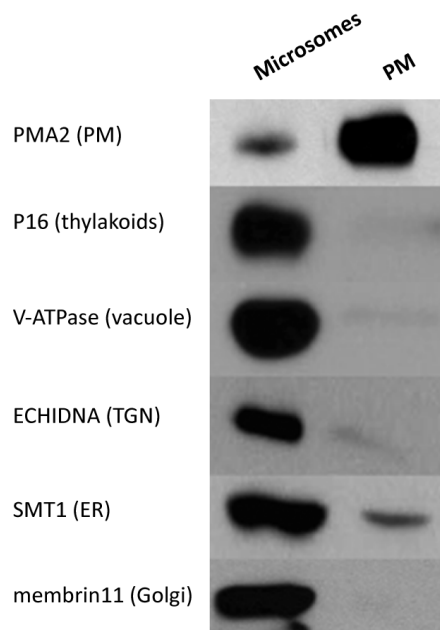

#### **Supplemental Figure 4.**

#### **Purity assessment of the PM fraction by immunoblot analyses.**

Compared to the microsomal fraction, the PM fraction is enriched for the PM marker PMA2 while strongly depleted in integral membrane proteins of the thylakoids (P16), vacuole (V-ATPase), trans-Golgi network (TGN) (ECHIDNA), endoplasmic reticulum (ER) (SMT1) and Golgi apparatus (Membrin11). The same amount of proteins (8  $\mu$ g) was loaded in each lane.

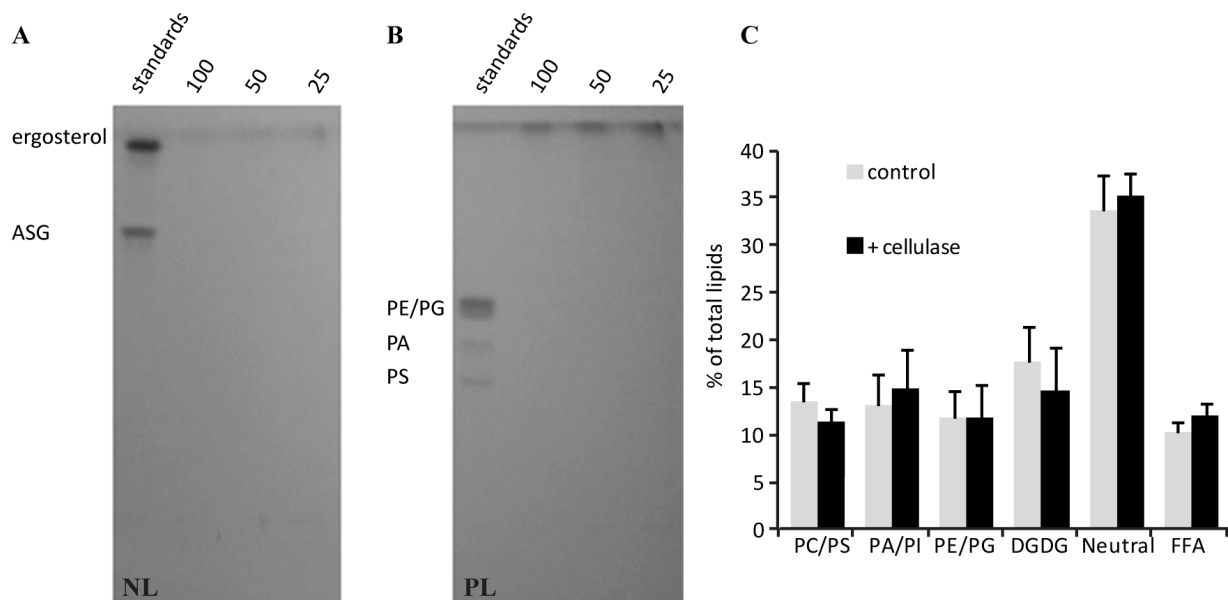

### Supplemental Figure 5.

**The cellulase solution used for PD isolation does not contain lipids or lipase activity.**

**(A, B)** HP-TLC migration for neutral lipids (NL) (A) and polar lipids (PL) (B). The cellulase powder (100, 50 and 25 mg) used in the PD purification procedure was subjected to lipid extraction and loaded on HP-TLC plates. Note that no lipids were detected.

**(C)** Membrane fractions (n=4) obtained from Arabidopsis suspension cells were subjected to cellulase treatment using the same experimental procedure as for the purification of PD. Lipids extracted from control membranes and cellulase-treated membranes were separated by HP-TLC and lipids quantified by densitometric scanning. Note that no significant differences were observed between the two sets (Wilcoxon statistical test). DGDG: digalactosyldiacylglycerol, FFA: free fatty acids, PA: phosphatidic acid, PC: phosphatidylcholine, PE: phosphatidylethanolamine, PG: phosphatidylglycerol, PI: phosphatidylinositol, PS: phosphatidylserine. Bars indicate SD.

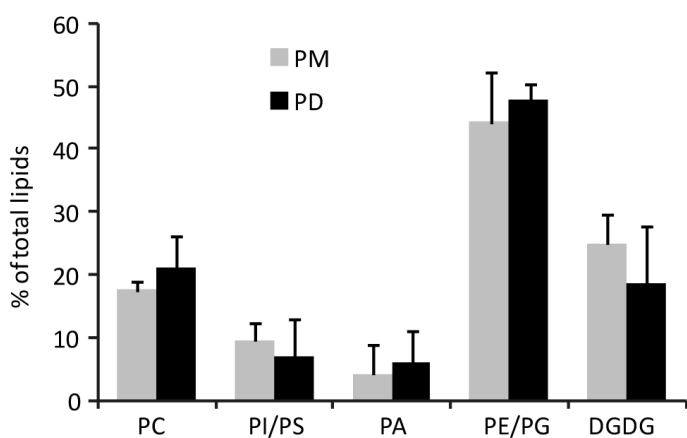

### Supplemental Figure 6.

#### Quantification by HP-TLC of the different glycerolipid classes from isolated PD and PM fractions from *Arabidopsis* suspension cells.

Lipids were separated by HP-TLC and after staining, quantified by densitometry scanning. Note that the glycerolipid profile is not significantly different between PD and PM samples (Wilcoxon statistical test). DGDG: digalactosyldiacylglycerol, PA: phosphatidic acid, PC: phosphatidylcholine, PE: phosphatidylethanolamine, PG: phosphatidylglycerol, PI: phosphatidylinositol, PS: phosphatidylserine. n=5 for PM and PD. Bars indicate SD.

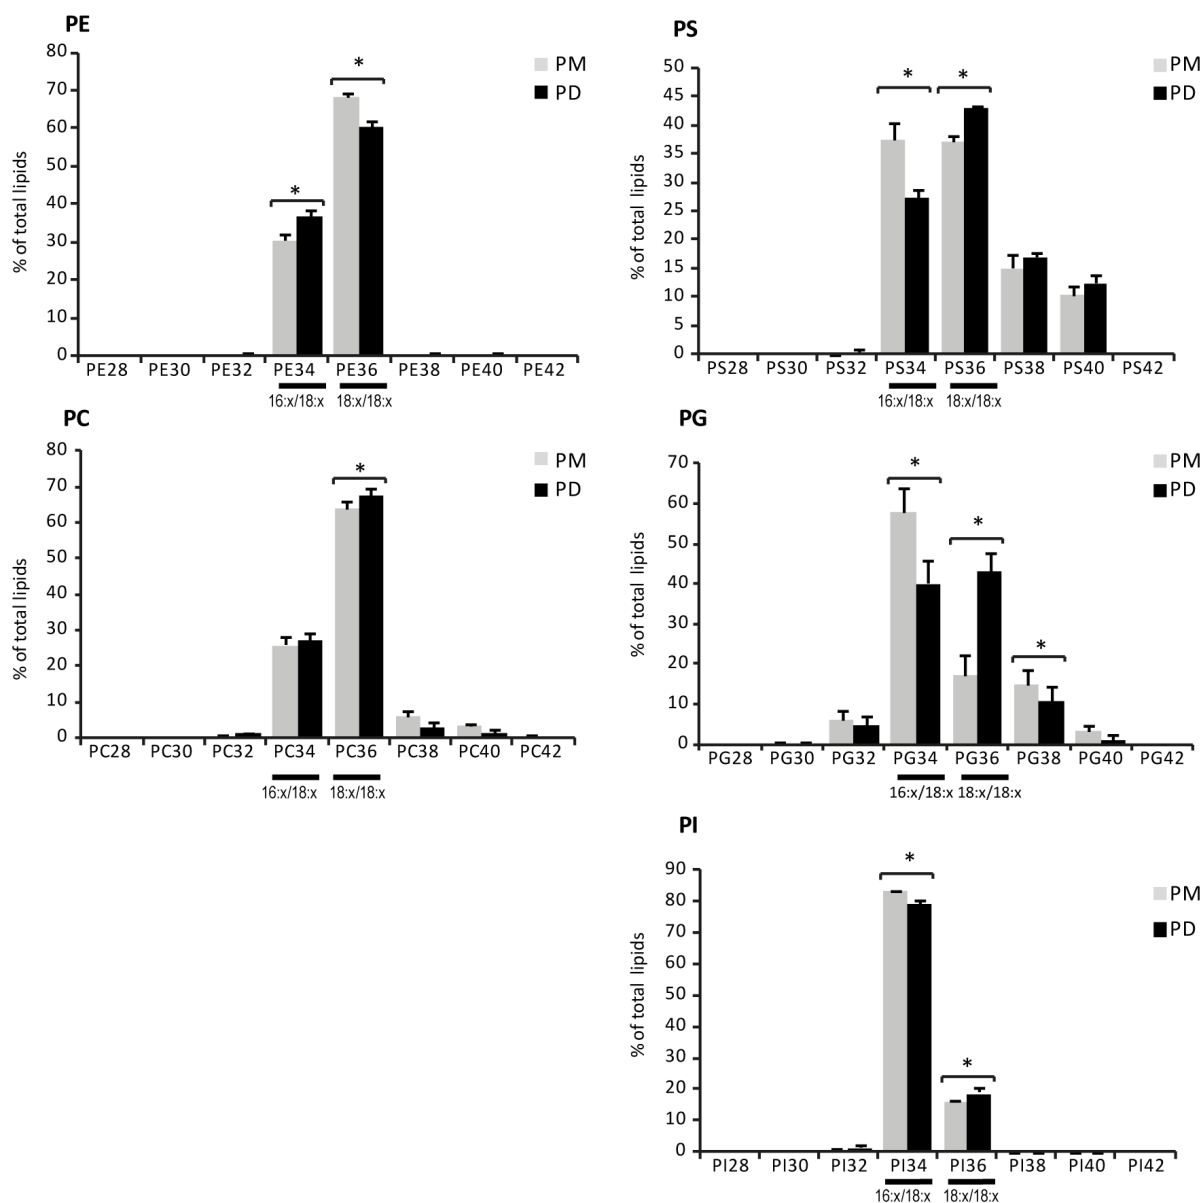

### Supplemental Figure 7.

**Quantification by LC-MS/MS of the phospholipid molecular species associated with the PD and PM fractions from Arabidopsis suspension cells.**

All phospholipid classes analysed (PC: phosphatidylcholine, PE: phosphatidylethanolamine, PG: phosphatidylglycerol, PI: phosphatidylinositol, PS: phosphatidylserine), are primarily composed of the long chain molecular species C34 and C36. These molecular species contain fatty acids of 16 or 18 carbon atoms (saturated or unsaturated) depicted as 16:x or 18:x. n=3 for PD and n=4 for PM. Asterisks indicate a significant difference ( $P < 0.05$ ) between two samples by Anova of Kruskal-Wallis test. n=3 for PD and n=4 for PM. Bars indicate SD.

For each phospholipid class, individual molecular species are expressed as a percentage of total phospholipid molecular species found in this class.

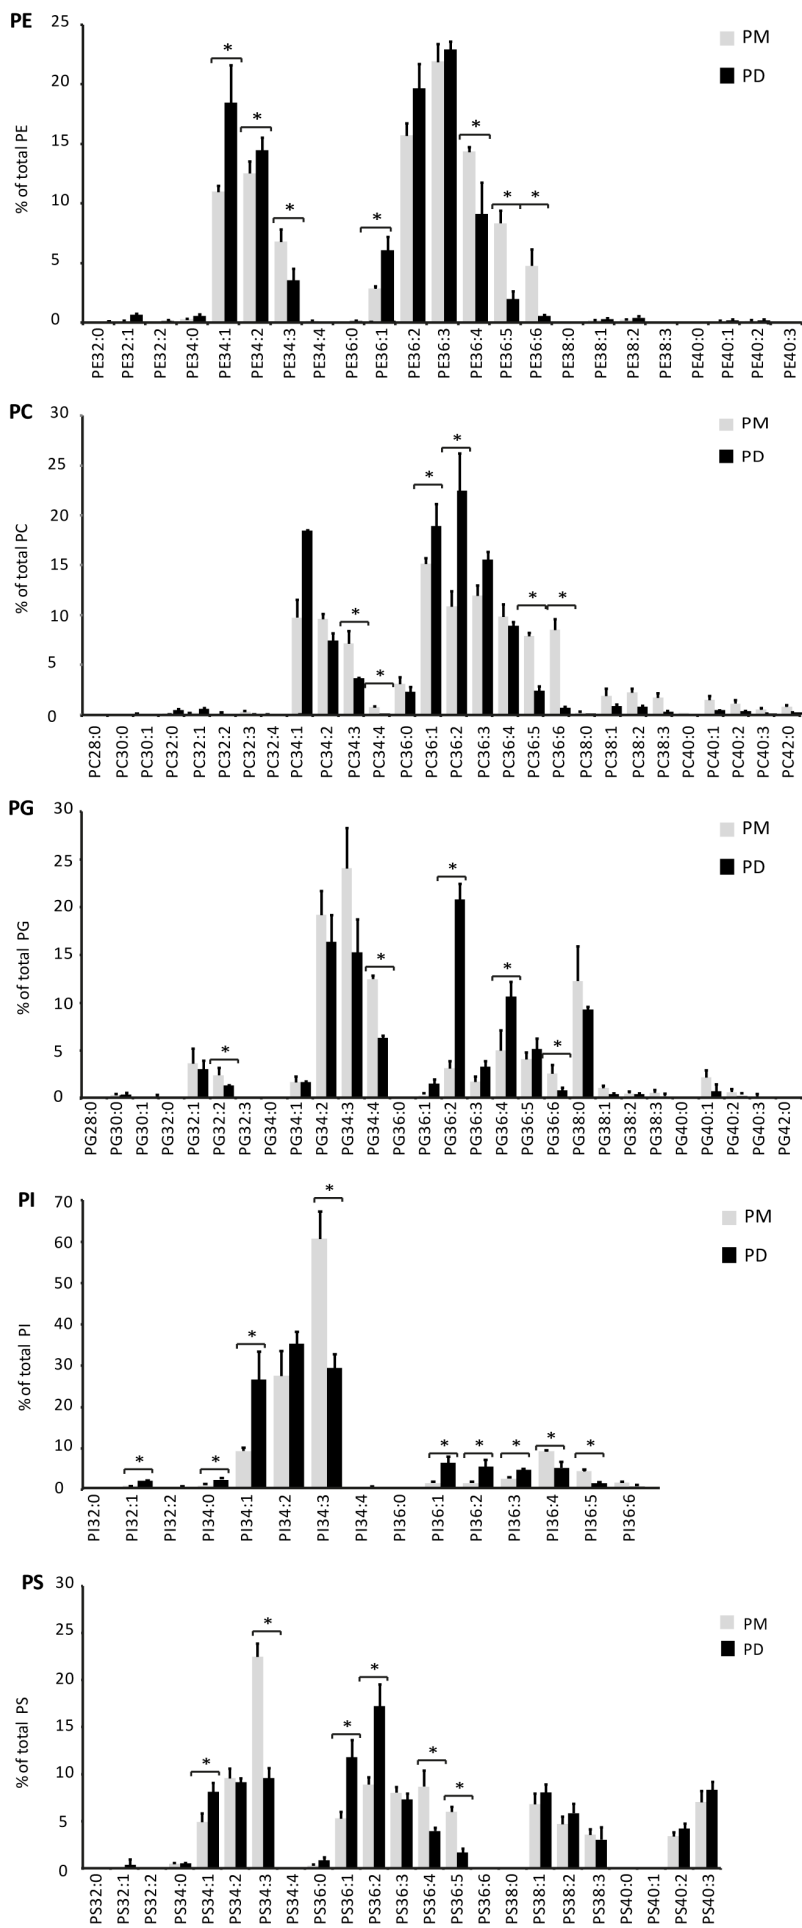

Supplemental Figure 8 online.



**Molecular composition of phospholipid species identified by LC-MS/MS.**

PC: phosphatidylcholine, PE: phosphatidylethanolamine, PG: phosphatidylglycerol, PI: phosphatidylinositol, PS: phosphatidylserine. Asterisks indicate a significant difference ( $P < 0.05$ ) between two samples by Anova of Kruskal-Wallis test.  $n=3$  for PD and  $n=4$  for PM. Bars indicate SD.

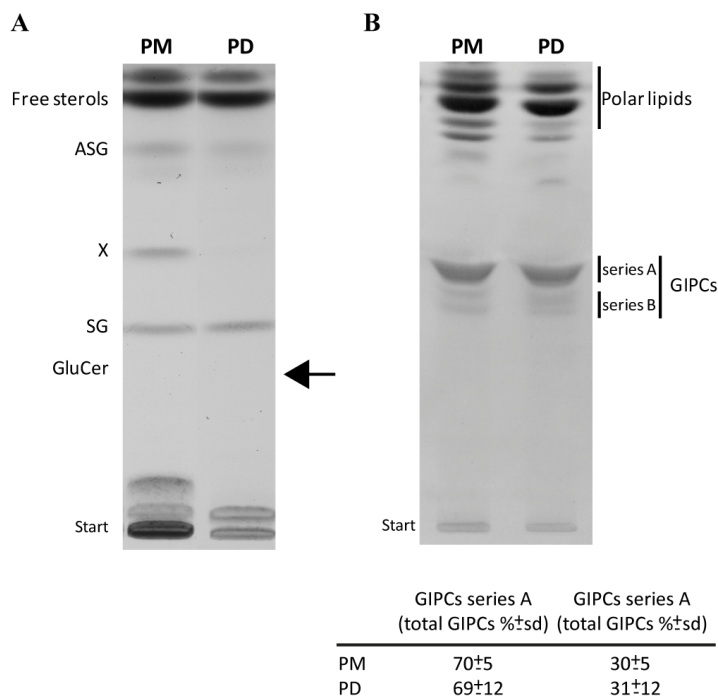

### Supplemental Figure 9.

**The complex sphingolipids GIPCs constitute the major sphingolipid classes found in isolated PD and PM fractions from Arabidopsis suspension cells.**

(A) HP-TLC analysis of neutral lipids showing that only traces of GluCer were detected in PD or PM extracts (arrow) (ASG: acylated sterol glucosides; SG: sterol glucosides; X: unidentified lipid).

(B) HP-TLC analysis of GIPC series from PD and PM extracts. Note that GIPC from series A and series B are the most prominent classes found in PD and PM extracts. Inset, the table shows GIPC contents quantified by densitometric scanning. n=3 for PM and PD.

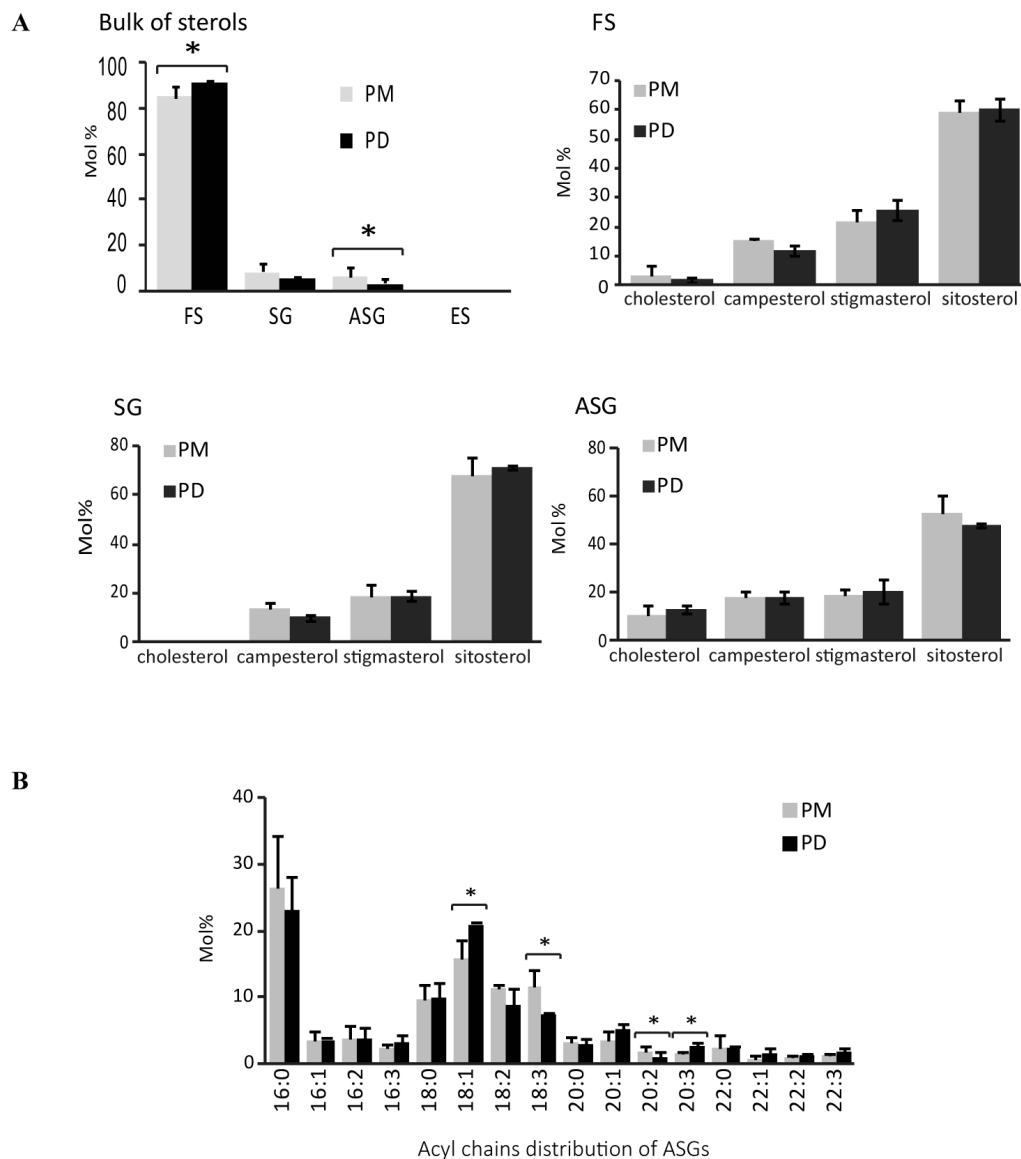

### Supplemental Figure 10.

The molecular species distribution of sterol lipid classes in isolated PD and PM fractions is similar. Sterol molecular species were determined by Q-TOF MS/MS analyses.

(A) Free sterols (FS) and conjugated sterols ((sterol glucosides (SG) and acylated sterol glucosides (ASG)) are equally distributed in PD and PM fractions. Sterol esters were not detected (not shown).

(B) The fatty acid composition of ASG.

Asterisks indicate a significant difference ( $P < 0.05$ ) between two samples by Annova of Kruskal-Wallis test.  $n=3$  for PD and  $n=4$  for PM. ( $n=3$  for all samples). Bars indicate SD.

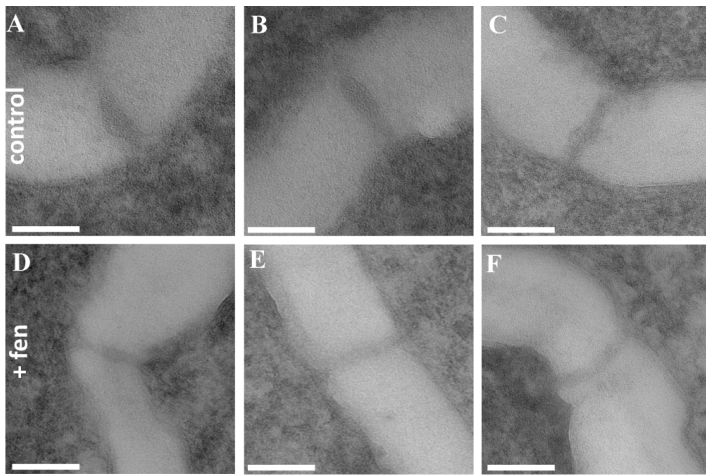

**Supplemental Figure 11.**

**Electron micrograph of cryofixed *Arabidopsis* roots treated with fenpropimorph for 24 h.**

PD from fen treated (24 h with 50  $\mu\text{g}/\text{mL}$ ) (**D-F**) or control (**A-C**) plants showed no obvious ultrastructural differences in *Arabidopsis* roots epidermal cells. Scale Bars= 100 nm

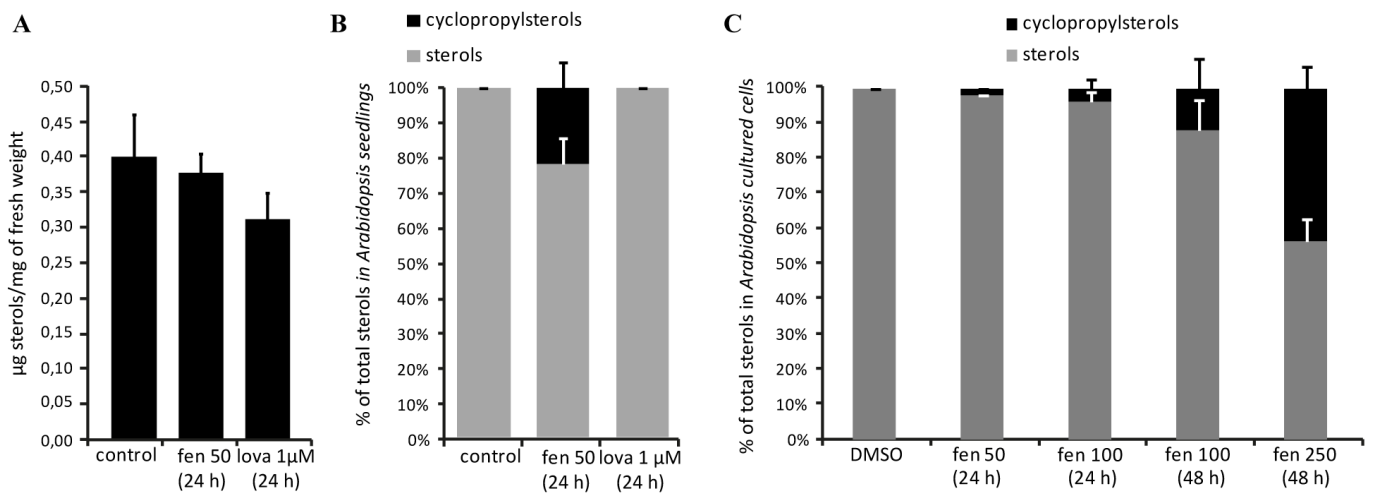

### Supplemental Figure 12.

#### Sterol composition of lova and fen treated *Arabidopsis* seedlings and cultured cells.

(A-B) Total amount of sterols (A) and relative proportion of sterols and cyclopropyl sterols (B) in *Arabidopsis* seedlings treated with either fenpropimorph (fen) or lovastatin (lova) for 24 h. n=2. Bars indicate SD.

(C) Relative proportion of sterols and cyclopropyl sterols in cultured cells treated with fen sterol inhibitor for different periods of time and concentrations.

fen50, 100, 250 correspond to concentration used in µg/mL. n=2. Bars indicate SD.

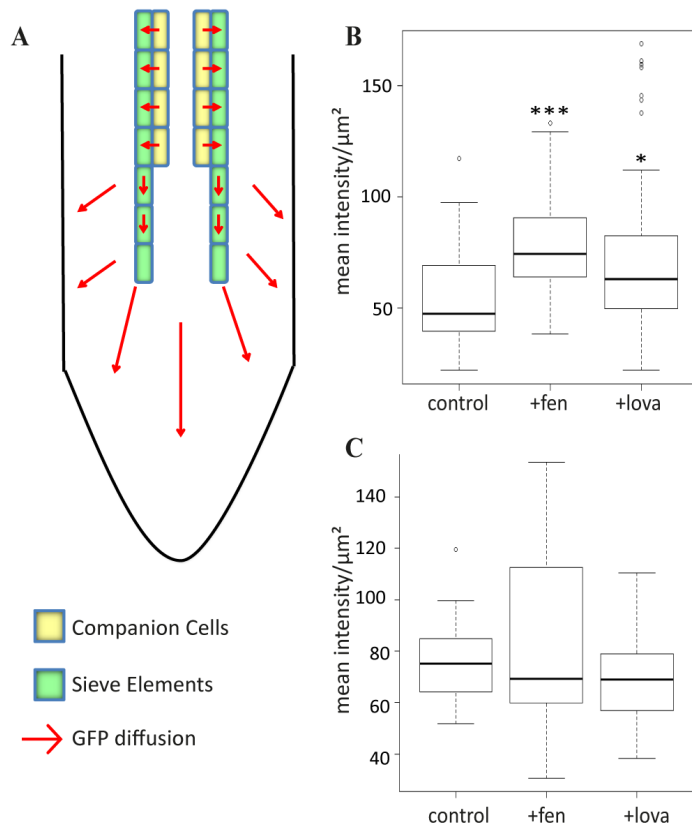

### Supplemental Figure 13.

**proSUC2:GFP intensity measurement in the vasculature of Arabidopsis roots treated with fen or lova for 24 h and 48 h.**

**(A)** Schematic presentation of Arabidopsis root highlighting the phloem companion cells and sieve elements and the symplastic unloading zone of proSUC2::GFP from the companion cells to the root meristem and surrounding tissues. Adapted from Vaten *et al.* 2011.

**(B, C)** Quantification of GFP fluorescence in the root vasculature of fen and lova treated plants for 24 h (B) and 48 h (C). Experiments were performed at least three independent times using a total of 20 seedlings per condition. Asterisks indicate significant differences ( $p < 0.05$  one asterisk and  $p < 0.001$  for three asterisks) using Wilcoxon test. Bars indicate SD.

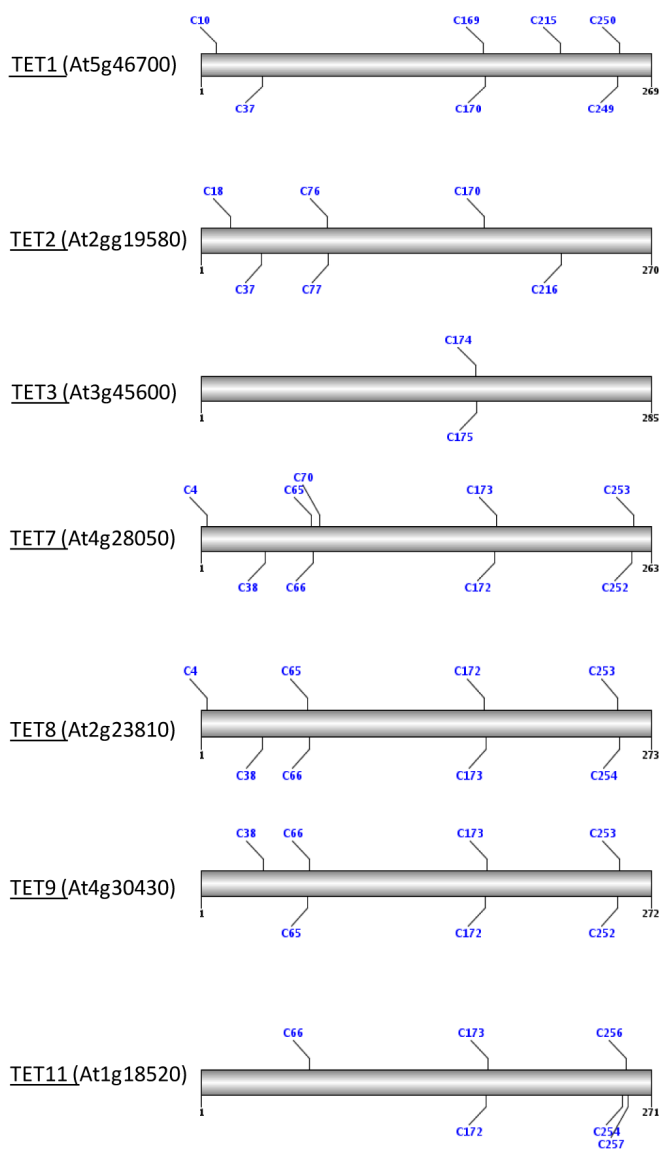

### Supplemental Figure 14.

#### List of the tetraspanins identified in the PD proteome and their putative S-acylation sites.

The PD and PM fractions were analysed using an MS-based proteomic approach (n=3) and members of the tetraspanin family presenting an enrichment in the PD-enriched membrane fraction were identified (See Supplemental Table 1). Prediction of post-translational lipid modification S-acylation (palmitoylation) was performed using CSS-palm software version 4 with high threshold settings (<http://csspalm.biocuckoo.org>). All tetraspanin members enriched at PD contained multiple putative S-acylation sites. In mammalian, palmitoylation of tetraspanins has been suggested to be essential for direct interaction with sterols (Charrin et al., 2003).

| Gene      | Putative function                                   | Peptide Count | Normalized abundance |         |         |            |            |            |            | Ratio       |            |
|-----------|-----------------------------------------------------|---------------|----------------------|---------|---------|------------|------------|------------|------------|-------------|------------|
|           |                                                     |               | PM1                  | PM2     | PM3     | PM average | PD1        | PD2        | PD3        | PD average  | PD vs PM   |
| AT5G42100 | beta-1,3-glucanase AtBG_PAP                         | 22            | 479 011              | 203 368 | 285 766 | 322 715    | 28 689 288 | 14 711 311 | 22 271 900 | 21890 833   | <b>68</b>  |
| AT3G13560 | beta-1,3-glucanase PdBG1                            | 9             | 31790                | 8 54    | 11662   | 17 322     | 280 801    | 8 1283     | 78 542     | 146 875,42  | <b>8</b>   |
| AT2G01630 | beta-1,3-glucanase PdBG2                            | 8             | 59 119               | 19 129  | 66 482  | 48 243     | 504 613    | 1678 216   | 577 068    | 919 965,73  | <b>19</b>  |
| AT5G61130 | plasmodesmata callose-binding protein 1             | 5             | 62 060               | 50 070  | 42 672  | 51601      | 710 555    | 716 986    | 842 575    | 756 705,45  | <b>15</b>  |
| AT1G69295 | plasmodesmata callose-binding protein 4             | 5             | 8 083                | 2 416   | 7 330   | 5 943      | 421928     | 506 728    | 207 064    | 378 573,47  | <b>64</b>  |
| AT3G58100 | plasmodesmata callose-binding protein 5             | 2             | 29 789               | 16 102  | 24 715  | 23 535     | 435 718    | 648 600    | 359 249    | 481188,93   | <b>20</b>  |
| AT5G43980 | plasmodesmata-located protein 1                     | 18            | 52 200               | 49 025  | 46 545  | 49 257     | 2 320 133  | 612 927    | 637 877    | 1190 312,62 | <b>24</b>  |
| AT1G04520 | plasmodesmata-located protein 2                     | 7             | 7 797                | 11852   | 6 006   | 8 552      | 230 735    | 116 991    | 138 617    | 162 114,55  | <b>19</b>  |
| AT2G33330 | plasmodesmata-located protein 3                     | 8             | 5 713                | 12 541  | 7 281   | 8 512      | 390 063    | 823 552    | 1026 415   | 746 676,69  | <b>88</b>  |
| AT3G60720 | plasmodesmata-located protein 8                     | 2             | 2 412                | 1715    | 209     | 1445       | 59 303     | 15 516     | 24 238     | 33 019,06   | <b>23</b>  |
| AT5G13000 | glucan synthase-like 12 (Vaten et al.)              | 64            | 562 909              | 172 032 | 150 882 | 295 274    | 738 438    | 1058 565   | 634 223    | 810 408,76  | <b>3</b>   |
| AT4G21380 | receptokinase3 (Calvino-Fernandez)                  | 5             | 11114                | 6 022   | 6 020   | 7 719      | 37 480     | 76 986     | 10 701     | 41722,23    | <b>5</b>   |
| AT5G46700 | tetraspanin1                                        | 11            | 182 081              | 125 421 | 72 867  | 126 790    | 720 133    | 709 982    | 856 515    | 762 209,98  | <b>6</b>   |
| AT2G19580 | tetraspanin2                                        | 3             | 35 182               | 10 500  | 8 172   | 17 951     | 313 299    | 301 180    | 159 504    | 257 994,13  | <b>14</b>  |
| AT3G45600 | tetraspanin3                                        | 9             | 42 733               | 27 389  | 10 263  | 26 795     | 377 033    | 208 541    | 223 256    | 269 609,92  | <b>10</b>  |
| AT4G28050 | tetraspanin7                                        | 6             | 24 834               | 5 932   | 15 800  | 15 522     | 187 976    | 94 286     | 103 768    | 128 676,87  | <b>8</b>   |
| AT2G23810 | tetraspanin8                                        | 9             | 64 239               | 62 021  | 84 805  | 70 355     | 570 949    | 768 498    | 816 525    | 718 657,35  | <b>10</b>  |
| AT4G30430 | tetraspanin9                                        | 1             | 2                    | -       | 134     | 68         | 2 554      | 9 800      | 9 392      | 7 248,71    | <b>107</b> |
| AT1G18520 | tetraspanin11                                       | 3             | 647                  | 941     | 424     | 671        | 18 404     | 16 318     | 24 413     | 19 711,85   | <b>29</b>  |
| AT4G30190 | H(+)-ATPase 2                                       | 26            | 1406535              | 2290913 | 1391704 | 1696384    | 63475      | 63856      | 64241      | 63857       | <b>27</b>  |
| AT2G18960 | H(+)-ATPase 1                                       | 45            | 5010932              | 4867643 | 4828582 | 4902386    | 125092     | 240364     | 232597     | 199351      | <b>25</b>  |
| AT5G64740 | cellulose synthase 6                                | 2             | 4814                 | 8295    | 4973    | 6027       | 211        | 357        | 217        | 262         | <b>23</b>  |
| AT4G20260 | associated cation-binding                           | 11            | 1292554              | 1898883 | 1291212 | 1494217    | 80806      | 76672      | 63312      | 73597       | <b>20</b>  |
| AT4G33430 | BRL1-associated receptor kinase                     | 6             | 132045               | 213147  | 75759   | 140317     | 5389       | 6362       | 8294       | 6682        | <b>21</b>  |
| AT5G62690 | tubulin beta chain 2                                | 5             | 388882               | 347472  | 312021  | 349458     | 8408       | 12869      | 26984      | 16087       | <b>22</b>  |
| AT2G18730 | diacylglycerol kinase 3                             | 12            | 634696               | 1089678 | 574622  | 766332     | 42859      | 32802      | 50111      | 41924       | <b>18</b>  |
| AT4G35100 | plasma membrane intrinsic protein 3                 | 3             | 1309906              | 1950291 | 692683  | 1317627    | 82537      | 206213     | 185625     | 158125      | <b>8</b>   |
| AT5G55730 | FASCICLIN-like arabinogalactan 1                    | 5             | 763120               | 1679492 | 727074  | 1056562    | 12741      | 9812       | 7970       | 10174       | <b>104</b> |
| AT1G01620 | plasma membrane intrinsic protein 1C                | 1             | 1116661              | 1162463 | 479441  | 919522     | 157396     | 324658     | 299709     | 260588      | <b>4</b>   |
| AT1G49340 | Phosphatidylinositol 3- and 4-kinase family protein | 21            | 179769               | 186056  | 67531   | 144452     | 2623       | 3332       | 3298       | 3084        | <b>47</b>  |

## Supplemental Table 1.

### List of PD- and PM- associated proteins identified by proteomic analysis.

Identification of PD and PM proteins by LC-MS/MS analyses from PD- and PM-enriched membrane fractions. n=3 for PD and PM fraction. Ten micrograms of protein was analysed for each fractions.



| Name        | Gene      | Putative function                  | Reference                     | PD localization reference     | GPI | sterol dependant DIM association | DIM reference                                 |
|-------------|-----------|------------------------------------|-------------------------------|-------------------------------|-----|----------------------------------|-----------------------------------------------|
| AtBG-pap    | At5g42100 | GHL17                              | Bayer et al. 2006             | Levy et al 2007               | Yes | Yes                              | Kierszniowska et al. 2008                     |
| glucanase   | At5g58090 | GHL17                              | Fernandez-Calvino et al. 2011 | Fernandez-Calvino et al. 2011 | Yes | yes                              | Zauber et al. 2014; Kierszniowska et al. 2008 |
| pdGB1       | At3g13560 | GHL17                              | Bayer et al. 2006             | Benitez-Alfonso et al. 2013   | Yes | Yes                              | Zauber et al. 2014; Kierszniowska et al. 2008 |
| pdGB2       | At2g01630 | GHL17                              | Benitez-Alfonso et al. 2013   | Benitez-Alfonso et al. 2013   | Yes | nf                               |                                               |
| pdGB3       | At1g66250 | GHL17                              | Benitez-Alfonso et al. 2013   | Benitez-Alfonso et al. 2013   | Yes | nf                               |                                               |
| PDCB1       | At5g61130 | regulation callose binding protein |                               | Simpson et al. 2009           | Yes | nf                               |                                               |
| PDCB2       | At5g08000 | regulation callose binding protein |                               | Simpson et al. 2009           | Yes | nf                               |                                               |
| PDCB3       | At1g18650 | regulation callose binding protein |                               | Simpson et al. 2009           | Yes | nf                               |                                               |
| PDCB like 4 | At1g69295 | callose binding protein like       |                               | Simpson et al. 2009           | Yes | nf                               |                                               |
| PDCB like 5 | At3g58100 | callose binding protein like       |                               | Simpson et al. 2009           | Yes | Yes                              | Kierszniowska et al. 2008                     |
| LYM2        | At2g17120 | Chitin perception                  |                               | Faulkner et al. 2013          | Yes | Yes                              | Kierszniowska et al. 2008                     |

## Supplemental Table 2.

### List of PD GPI-anchored proteins and their occurrence in DIM.

List of GPI-anchored proteins identified in proteomic analyses of PD-enriched membrane fractions. DIM: Detergent Insoluble Membrane. GPI: Glycosyl Phosphoinositol.

## Supplemental References

- Bayer, E.M., Bottrill, A.R., Walshaw, J., Vigouroux, M., Naldrett, M.J., Thomas, C.L., and Maule, A.J.** (2006). Arabidopsis cell wall proteome defined using multidimensional protein identification technology. *Proteomics* **6**, 301-311.
- Benitez-Alfonso, Y., Faulkner, C., Pendle, A., Miyashima, S., Helariutta, Y., and Maule, A.** (2013). Symplastic intercellular connectivity regulates lateral root patterning. *Dev Cell* **26**, 136-147.
- Charrin, S., Maniè, S., Thiele, C., Billard, M., Gerlier, D., Boucheix, C., and Rubinstein, E.** (2003). A physical and functional link between cholesterol and tetraspanins. *Eur. J. Immunol.* **33**, 2579-2489.
- Faulkner, C., Petutschnig, E., Benitez-Alfonso, Y., Beck, M., Robatzek, S., Lipka, V., and Maule, A.J.** (2013). LYM2-dependent chitin perception limits molecular flux via plasmodesmata. *Proc Natl Acad Sci U S A* **110**, 9166-9170.
- Fernandez-Calvino, L., Faulkner, C., Walshaw, J., Saalbach, G., Bayer, E., Benitez-Alfonso, Y., and Maule, A.** (2011). Arabidopsis plasmodesmal proteome. *PLoS One* **6**, e18880.
- Kierszniowska, S., Seiwert, B., and Schulze, W.X.** (2008). Definition of Arabidopsis sterol-rich membrane microdomains by differential treatment with methyl-beta-cyclodextrin and quantitative proteomics. *Mol. Cell. Proteomics* **8**, 612-623.
- Levy, A., Erlanger, M., Rosenthal, M., and Epel, B.L.** (2007). A plasmodesmata-associated beta-1,3-glucanase in Arabidopsis. *Plant J* **49**, 669-682.
- Simpson, C., Thomas, C., Findlay, K., Bayer, E., and Maule, A.J.** (2009). An Arabidopsis GPI-anchor plasmodesmal neck protein with callose binding activity and potential to regulate cell-to-cell trafficking. *Plant Cell* **21**, 581-594.
- Vaten, A., Dettmer, J., Wu, S., Stierhof, Y.D., Miyashima, S., Yadav, S.R., Roberts, C.J., Campilho, A., Bulone, V., Lichtenberger, R., Lehesranta, S., Mahonen, A.P., Kim, J.Y., Jokitalo, E., Sauer, N., Scheres, B., Nakajima, K., Carlsbecker, A., Gallagher, K.L., and Helariutta, Y.** (2011). Callose biosynthesis regulates symplastic trafficking during root development. *Dev Cell* **21**, 1144-1155.
- Zauber, H., Burgos, A., Garapati, P., and Schulze, W.X.** (2014). Plasma membrane lipid-protein interactions affect processes in sterol-biosynthesis mutants in *Arabidopsis thaliana*. *Frontiers in Plant Science*. **5**, Article 78.
